# Supplementary material for: Rare earth-free high color rendering white light-emitting diodes using CsVO3 with highest quantum efficiency for vanadate phosphors
Source: Royal Society of Chemistry journal article supplement (doi:10.1039/c5tc01929j), 2015-01-01
Supplement: c5tc01929j1.pdf [file c5tc01929j1.pdf]

*Electronic Supplementary Information*

## Rare Earth-Free High Color Rendering White Light-Emitting Diodes Using CsVO<sub>3</sub> with Highest Quantum Efficiency for Vanadate Phosphors

Tomohiko Nakajima,<sup>\*a</sup> Masahiko Isobe,<sup>b</sup> Yuko Uzawa<sup>a</sup> and Tetsuo Tsuchiya<sup>a</sup>

<sup>a</sup> Advanced Coating Technology Research Center, National Institute of Advanced Industrial Science and Technology, Tsukuba Central 5, 1-1-1 Higashi, Tsukuba, Ibaraki, Japan.

<sup>b</sup> Max Planck Institute for Solid State Research, Heisenbergstrasse 1, D-70569 Stuttgart, Germany.

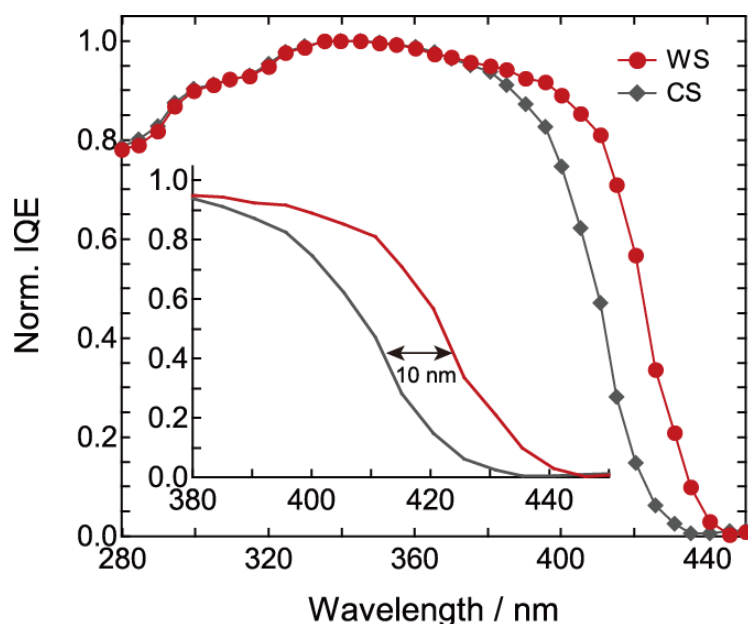

Figure S1: Normalized IQE spectra for CsVO<sub>3</sub>-WS and CsVO<sub>3</sub>-CS.

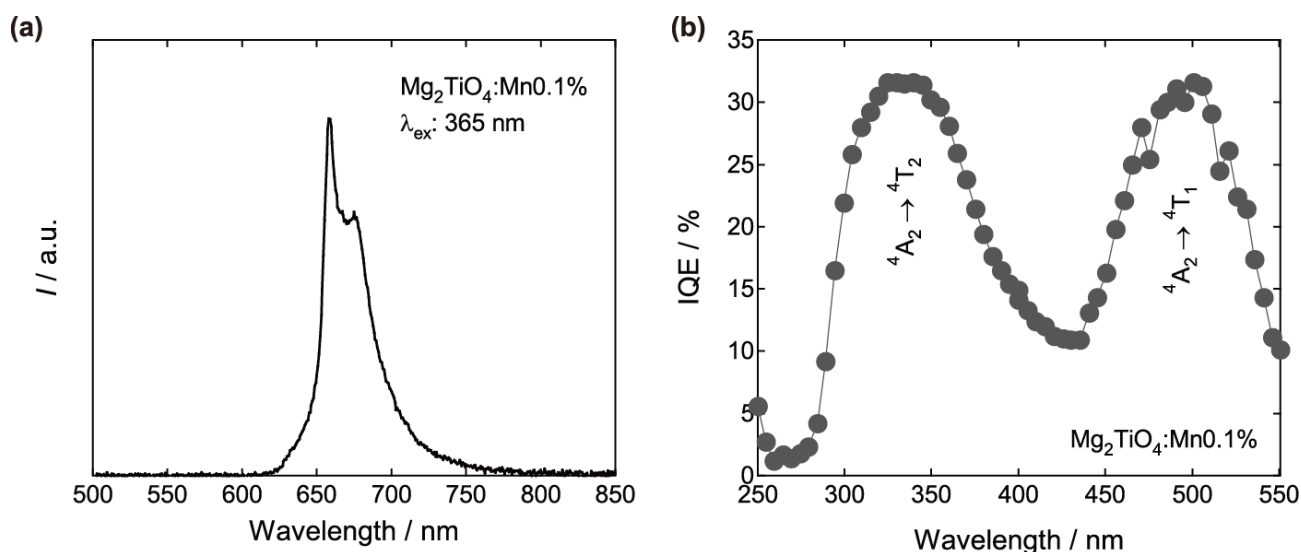

**Figure S2:** (a) PL and (b) IQE spectra for  $\text{Mg}_2\text{TiO}_4:\text{Mn}0.1\%$ .

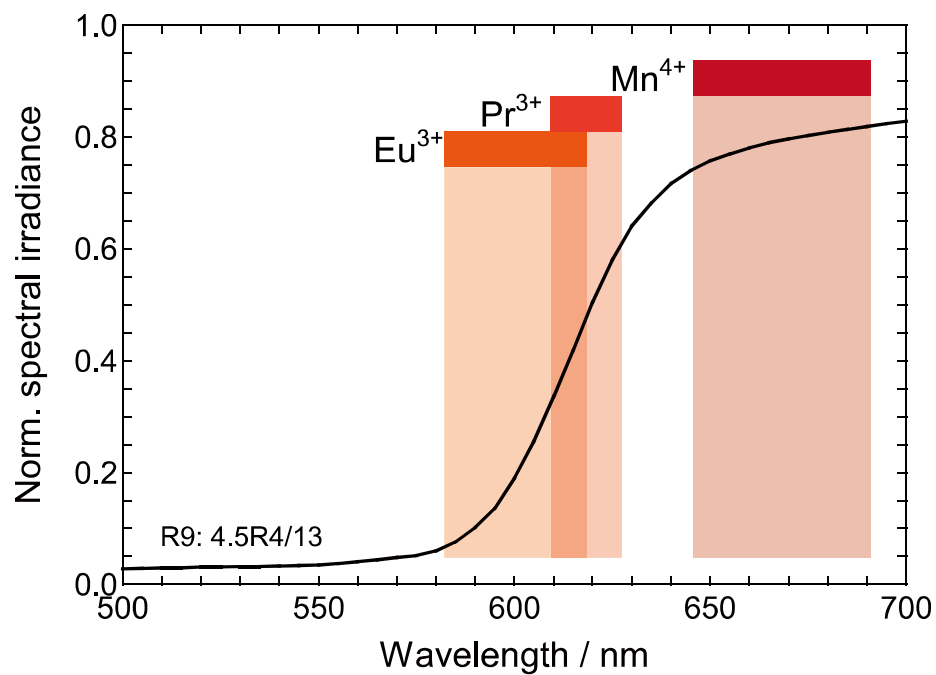

**Figure S3:** Normalized spectral irradiance for CRI of R9.
